# Supplementary material for: Visible Light-Responsive Platinum-Containing Titania Nanoparticle-Mediated Photocatalysis Induces Nucleotide Insertion, Deletion and Substitution Mutations
Source: Nanomaterials (Basel). 2016 Dec 28;7(1):2. doi: 10.3390/nano7010002 (PMC5295192; doi:10.3390/nano7010002)
Supplement: Supplementary file 1 [file nanomaterials-07-00002-s001.pdf]

# Supplementary Materials: Visible Light-Responsive Platinum-Containing Titania Nanoparticle-Mediated Photocatalysis Induces Nucleotide Insertion, Deletion, and Substitution Mutations

Der-Shan Sun, Yao-Hsuan Tseng, Wen-Shiang Wu, Ming-Show Wong and Hsin-Hou Chang

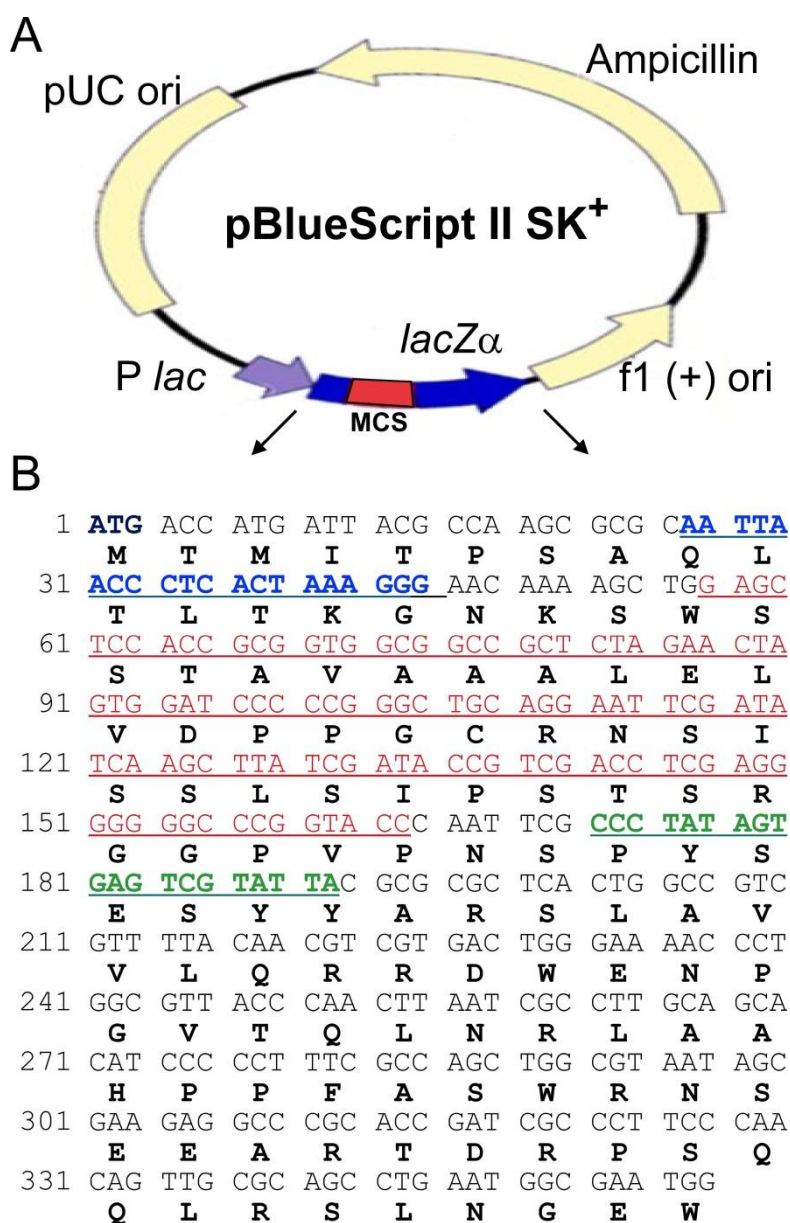

**Figure S1.** Plasmid map and DNA sequence of the *lacZ*  $\alpha$ -peptide coding region. The map of the plasmid pBlueScript II SK<sup>+</sup>, a plasmid with approximately 3K base pairs, in which the coding regions of *lac* promoter (*P lac*), *lacZ*  $\alpha$ -peptide (*lacZ* $\alpha$ ), multiple cloning size (MCS), f1 replication origin (ori), ampicillin-resistant gene and pUC replication origin (ori) are indicated (A). The DNA and the corresponding amino acids sequences encoded by *lacZ* $\alpha$  are also indicated, in which the sequence of MCS is labeled in red, the T3 promoter primer sequence in blue and the T7 promoter primer sequence in green (B).

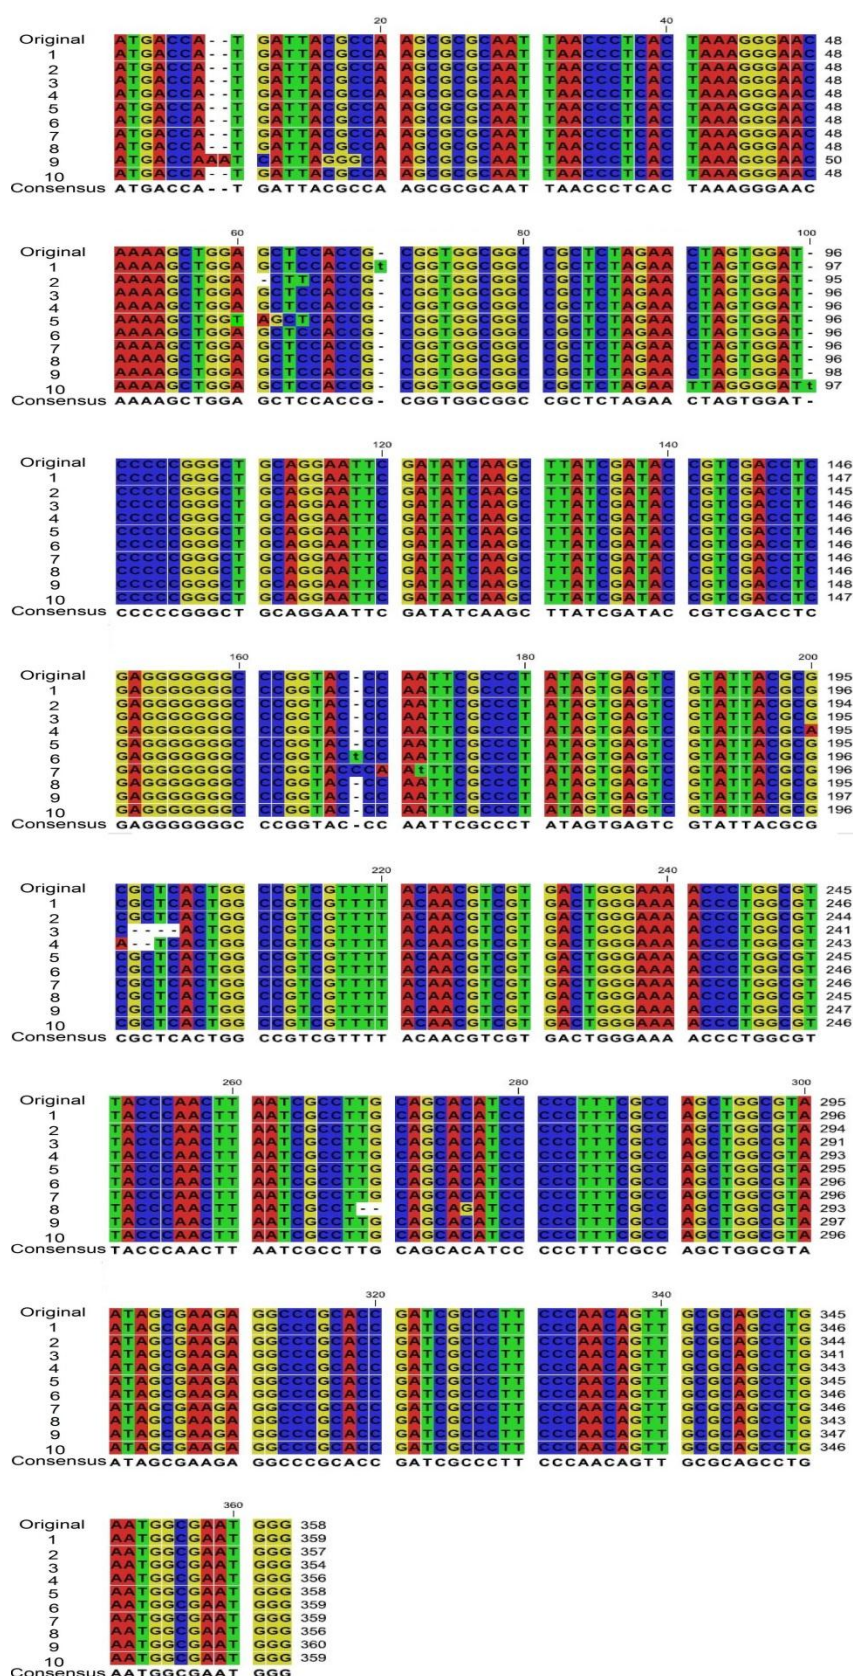

**Figure S2.** Mutations in the *lacZα* region. Ten mutated clones, which are shown in Figure 5, are indicated with additional highlighted color backgrounds.

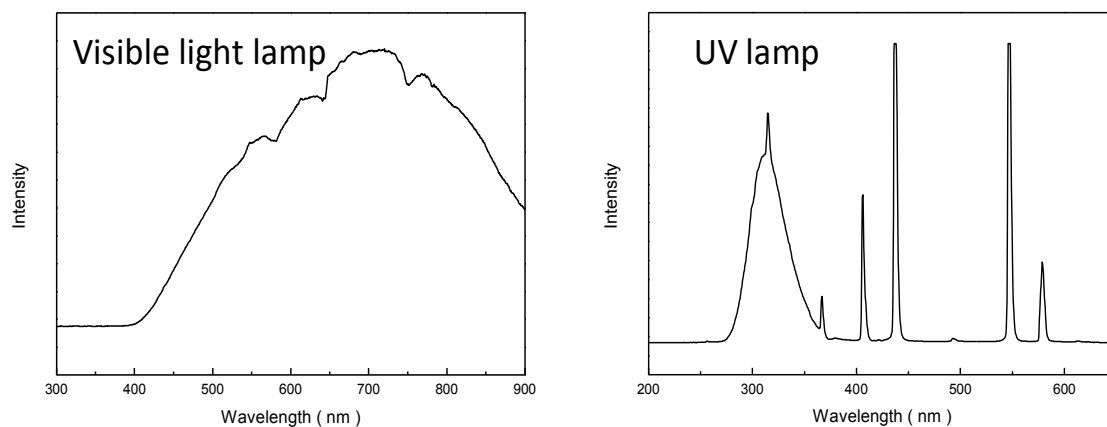

**Figure S3.** Spectrum analysis. Emission spectra of irradiated UV light and visible light used in this study are illustrated, in which the  $x$  axis indicates the relative light intensity and the  $y$  axis indicates the wavelength (nm).

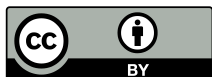

© 2016 by the authors. Submitted for possible open access publication under the terms and conditions of the Creative Commons Attribution (CC-BY) license (<http://creativecommons.org/licenses/by/4.0/>).
